# Supplementary material for: Clinically Applicable System For 3D Teeth Segmentation in Intraoral Scans using Deep Learning
Source: Research Square preprint supplement (doi:10.21203/rs.3.rs-103285/v1), 2020-11-10
Supplement: Supplementary file 2 [file 2856eb20670acf38255a7b5c.docx]

| **Table. 4: Statistical Analysis of the segmentation results for individual teeth and gingiva with DL (Mandible, tested on n=100 patients).** | | | | | | |
| --- | --- | --- | --- | --- | --- | --- |
| **Class** | **n*** | **AUC** | **SENS (%)** | **SPEC (%)** | **PPV (%)** | **NPV (%)** |
| Gingiva | 100 | **0.9972 (0.9966, 0.9978)** | 95.67 (95.23, 96.11) | **98.26 (97.98, 98.53)** | 97.14 (96.69, 97.60) | **97.34 (97.08, 97.60)** |
| Tooth 31 | 99 | 0.9994 (0.9988, 1.0000) | 92.87 (89.76, 95.99) | 99.85 (99.82, 99.88) | **93.18 (90.65, 95.72)** | 99.83 (99.76, 99.89) |
| Tooth 32 | 97 | 0.9998 (0.9998, 0.9999) | 96.00 (95.59, 96.42) | 99.87 (99.86, 99.89) | 95.58 (95.18, 95.98) | 99.89 (99.87, 99.90) |
| Tooth 33 | 100 | 0.9999 (0.9999, 0.9999) | 96.47 (95.73, 97.22) | 99.88 (99.87, 99.90) | 96.70 (96.42, 96.97) | 99.88 (99.86, 99.90) |
| Tooth 34 | 99 | 0.9999 (0.9998, 0.9999) | 96.32 (94.94, 97.70) | **99.89 (99.88, 99.90)** | 97.18 (96.96, 97.41) | 99.85 (99.79, 99.91) |
| Tooth 35 | 99 | 0.9991 (0.9976, 1.0006) | 95.33 (93.13, 97.53) | 99.84 (99.77, 99.90) | 95.88 (93.90, 97.86) | 99.76 (99.60, 99.93) |
| Tooth 36 | 97 | 0.9988 (0.9966, 1.0010) | 97.15 (95.15, 99.14) | 99.72 (99.55, 99.90) | 96.62 (94.60, 98.64) | 99.77 (99.61, 99.93) |
| Tooth 37 | 98 | 0.9989 (0.9968, 1.0009) | 96.91 (94.92, 98.91) | 99.76 (99.60, 99.91) | 96.54 (94.56, 98.52) | 99.80 (99.67, 99.93) |
| Tooth 38 | **27** | 0.9980 (0.9966, 0.9995) | **68.20 (53.17, 83.23)** | 99.81 (99.70, 99.93) | 93.83 (90.85, 96.81) | 99.32 (99.00, 99.63) |
| Tooth 41 | 98 | 0.9992 (0.9985, 0.9999) | 92.25 (88.91, 95.59) | 99.87 (99.85, 99.88) | 93.71 (91.49, 95.93) | 99.79 (99.69, 99.88) |
| Tooth 42 | 98 | 0.9998 (0.9998, 0.9999) | 95.09 (94.31, 95.87) | 99.89 (99.88, 99.90) | 96.25 (95.98, 96.53) | 99.86 (99.83, 99.88) |
| Tooth 43 | 100 | **0.9999 (0.9999, 0.9999)** | 96.98 (96.74, 97.22) | 99.87 (99.86, 99.89) | 96.46 (96.18, 96.74) | **99.90 (99.89, 99.90)** |
| Tooth 44 | 99 | 0.9997 (0.9993, 1.0000) | 96.44 (94.48, 98.40) | 99.87 (99.86, 99.89) | 96.82 (96.55, 97.09) | 99.86 (99.77, 99.94) |
| Tooth 45 | 100 | 0.9998 (0.9996, 0.9999) | 96.81 (96.09, 97.53) | 99.82 (99.73, 99.91) | 96.34 (95.35, 97.34) | 99.86 (99.83, 99.90) |
| Tooth 46 | 98 | 0.9999 (0.9999, 0.9999) | **98.11 (97.94, 98.29)** | 99.83 (99.82, 99.85) | **97.87 (97.71, 98.04)** | 99.86 (99.84, 99.87) |
| Tooth 47 | 99 | 0.9993 (0.9982, 1.0000) | 97.19 (95.80, 98.58) | 99.74 (99.63, 99.86) | 96.27 (95.17, 97.37) | 99.84 (99.77, 99.91) |
| Tooth 48 | **22** | **0.9976 (0.9952, 1.0000)** | **68.43 (52.48, 84.37)** | 99.88 (99.79, 99.96) | 95.44 (92.70, 98.18) | 98.77 (97.91, 99.63) |
| **Mean** | | 0.9992 | 92.72 | 99.74 | 95.99 | 99.60 |
