# Supplementary material for: Clinically Applicable System For 3D Teeth Segmentation in Intraoral Scans using Deep Learning
Source: Research Square preprint supplement (doi:10.21203/rs.3.rs-103285/v1), 2020-11-10
Supplement: Supplementary file 3 [file 8726835fef265a00004948e0.docx]

| **Table 1. Segmentation results of the CNN, DL and DLBS models (tested on n=100 patients).** | | | | | | |
| --- | --- | --- | --- | --- | --- | --- |
| **Model** | **Mandible** | | | **Maxillary** | | |
| **mIoU(%)** | **ACCf(%)** | **ACCa(%)** | **mIoU(%)** | **ACCf(%)** | **ACCa(%)** |
| CNN [1] | 85.32 [81.96, 88.69] | 91.74 [89.77, 93.72] | 93.75 [92.14, 95.36] | 89.68 [86.90, 92.48] | 94.14 [92.35, 95.93] | 95.80 [94.37, 97.22] |
| DL | 91.93 [91.09, 92.78] | 96.01 [95.42, 96.61] | 97.98 [97.56, 98.41] | 92.18 [91.02, 93.36] | 95.99 [95.28, 96.71] | 97.90 [97.33, 98.45] |
| DLBS | **93.61 [92.68, 94.55]** | **96.90 [96.28, 97.53]** | **98.17 [97.24, 99.11]** | **94.23 [92.47, 96.01]** | **96.98 [95.93, 98.04]** | **98.34 [97.63, 99.05]** |
| 95% confidence intervals are reported in the brackets.  mIoU: mean Intersection over Union, ACCf: per-face accuracy, ACCa: average-area accuracy. | | | | | | |
