# Supplementary material for: Clinically Applicable System For 3D Teeth Segmentation in Intraoral Scans using Deep Learning
Source: Research Square preprint supplement (doi:10.21203/rs.3.rs-103285/v1), 2020-11-10
Supplement: Supplementary file 4 [file a55dfc911063555f44ed5be1.docx]

| **Table 2. Model Complexity and Clinical Utility. (tested on n=100 patients).** | | | | |
| --- | --- | --- | --- | --- |
| **Models** | **Baseline** | **DL** | **DLBS** | **Human Experts** |
| #Params(M) | 0.4 | 1.5 | 1.5 | - |
| Inf-T(s) | ~321 | ~4 | ~24 | ~600-900 |
| #Params: number of parameters in the neural networks. Inf-T: end-to-end inference time of models. ~ means approximately. | | | | |
