# Supplementary material for: Clinically Applicable System For 3D Teeth Segmentation in Intraoral Scans using Deep Learning
Source: Research Square preprint supplement (doi:10.21203/rs.3.rs-103285/v1), 2020-11-10
Supplement: Supplementary file 10 [file 9dd853514f05ad336a03f4b0.docx]

| **Table. 3: Statistical Analysis of the segmentation results for individual teeth and gingiva with DL (Maxillary, tested on n=100 patients).** | | | | | | |
| --- | --- | --- | --- | --- | --- | --- |
| **Class** | **n*** | **AUC** | **SENS (%)** | **SPEC (%)** | **PPV (%)** | **NPV (%)** |
| Gingiva | 100 | 0.9975 (0.9971, 0.9980) | 95.95 (95.62, 96.28) | **98.32 (98.03, 98.60)** | **97.56 (97.18, 97.93)** | **97.25 (97.03, 97.46)** |
| Tooth 11 | 100 | 0.9998 (0.9997, 0.9999) | 95.90 (95.04, 96.76) | 99.87 (99.85, 99.90) | 96.65 (96.00, 97.29) | 99.85 (99.82, 99.88) |
| Tooth 12 | 99 | 0.9998 (0.9996, 1.0000) | 96.37 (95.57, 97.18) | 99.87 (99.84, 99.90) | 95.72 (94.93, 96.50) | 99.89 (99.86, 99.92) |
| Tooth 13 | 100 | 0.9994 (0.9989, 1.0000) | 95.50 (93.39, 97.62) | 99.84 (99.79, 99.90) | 94.86 (92.66, 97.07) | 99.87 (99.81, 99.92) |
| Tooth 14 | 96 | 0.9991 (0.9980, 1.0000) | 94.26 (90.99, 97.52) | 99.84 (99.77,99.91) | 95.16 (92.37, 97.94) | 99.79 (99.67, 99.90) |
| Tooth 15 | 98 | 0.9984 (0.9968, 1.0000) | 94.17 (90.80,97.54) | 99.75 (99.63, 99.88) | 93.53 (90.25, 96.81) | 99.79 (99.67, 99.90) |
| Tooth 16 | 100 | 0.9979 (0.9957, 1.0000) | 94.21 (90.70, 97.72) | 99.70 (99.51,99.88) | 94.94 (91.71, 98.17) | 99.67 (99.48, 99.85) |
| Tooth 17 | 99 | 0.9977 (0.9953, 1.0000) | 94.91 (91.56, 98.26) | 99.66 (99.47,99.84) | 94.09 (90.79, 97.40) | 99.70 (99.49, 99.90) |
| Tooth 18 | **35** | **0.9969 (0.9938, 1.0000)** | **80.45 (70.09, 90.81)** | 99.65 (99.36,99.94) | **90.11 (85.35, 94.86)** | 99.35 (98.90, 99.80) |
| Tooth 21 | 100 | 0.9999 (0.9999, 0.9999) | 96.94 (96.66, 97.21) | 99.86 (99.85,99.87) | 96.39 (96.13, 96.64) | 99.88 (99.87, 99.90) |
| Tooth 22 | 99 | 0.9999 (0.9999, 0.9999) | 96.90 (96.67, 97.13) | 99.89 (99.88,99.90) | 96.15 (95.87, 96.43) | **99.91 (99.90, 99.92)** |
| Tooth 23 | 100 | 0.9995 (0.9988, 1.0000) | 95.86 (93.92, 97.80) | **99.90 (99.89,99.91)** | 96.86 (96.64, 97.08) | 99.87 (99.81, 99.93) |
| Tooth 24 | 98 | 0.9998 (0.9997, 1.0000) | 96.21 (94.24, 98.17) | 99.88 (99.87,99.89) | 96.96 (96.63, 97.28) | 99.84 (99.74, 99.94) |
| Tooth 25 | 98 | 0.9999 (0.9999, 0.9999) | 97.02 (96.67, 97.37) | 99.88 (99.87,99.89) | 96.73 (96.50, 96.96) | 99.89 (99.88, 99.90) |
| Tooth 26 | 100 | 0.9998 (0.9996, 1.0000) | **97.68 (97.07, 98.28)** | 99.83 (99.81,99.84) | 97.40 (97.19, 97.60) | 99.85 (99.81, 99.89) |
| Tooth 27 | 98 | 0.9998 (0.9998, 0.9999) | 97.63 (96.70, 98.56) | 99.80 (99.78,99.83) | 96.62 (96.30, 96.94) | 99.86 (99.81, 99.92) |
| Tooth 28 | **34** | 0.9994 (0.9992, 0.9996) | **84.18 (75.76, 92.60)** | 99.78 (99.70,99.86) | **91.47 (88.63, 94.30)** | 99.65 (99.48, 99.83) |
| **Mean** | | 0.9991 | 94.36 | 99.72 | 95.36 | 99.64 |
| n*: the number of patients with the corresponding tooth in the 100 patients. AUC: area under the receiver operating characteristic curve.  SENS: sensitivity; SPEC: specificity; PPV: positive predictive value; NPV: negative predictive value. The 95% confidence intervals are reported in the braces. The highest and lowest (or second lowest) scores are highlighted with bold black or bold green, respectively. | | | | | | |
